# Supplementary material for: O/N ordering in the structure of Ca3Si2O4N2 and the luminescence properties of the Ce3+ doped material
Source: Royal Society of Chemistry journal article supplement (doi:10.1039/c2jm13852b), 2012-01-01

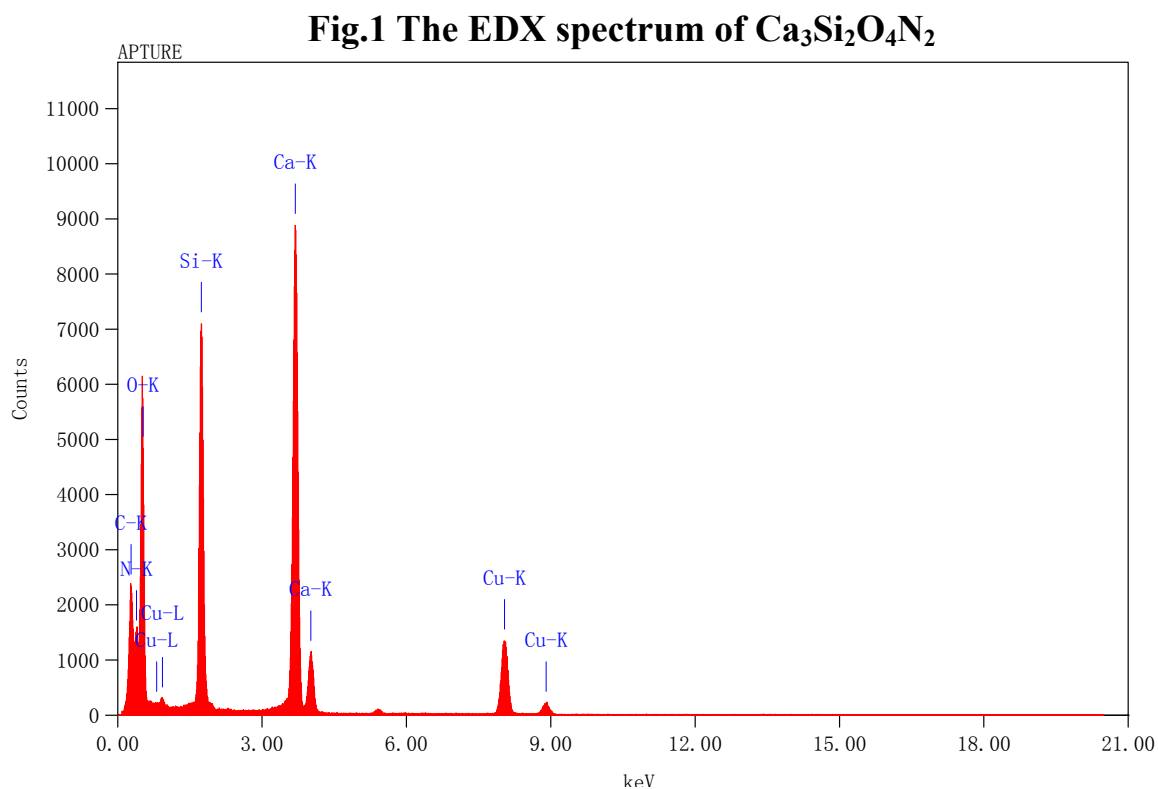

**Table.1 The EDX results on different particles**

| Elements<br>No. | Ca%          | Si%          | N%           | O%           |
|-----------------|--------------|--------------|--------------|--------------|
| <b>1</b>        | <b>25.95</b> | <b>18.68</b> | <b>17.86</b> | <b>37.52</b> |
| <b>2</b>        | <b>24.14</b> | <b>17.61</b> | <b>22.61</b> | <b>35.63</b> |
| <b>3</b>        | <b>24.87</b> | <b>18.33</b> | <b>18.69</b> | <b>38.11</b> |
| <b>4</b>        | <b>24.58</b> | <b>18.03</b> | <b>17.27</b> | <b>40.12</b> |
| <b>5</b>        | <b>25.20</b> | <b>18.13</b> | <b>18.25</b> | <b>38.42</b> |
| <b>6</b>        | <b>24.39</b> | <b>17.90</b> | <b>20.71</b> | <b>37.00</b> |
| <b>Average</b>  | <b>24.86</b> | <b>18.11</b> | <b>19.23</b> | <b>37.80</b> |

**Fig.2 Thermogravimetric Analysis**

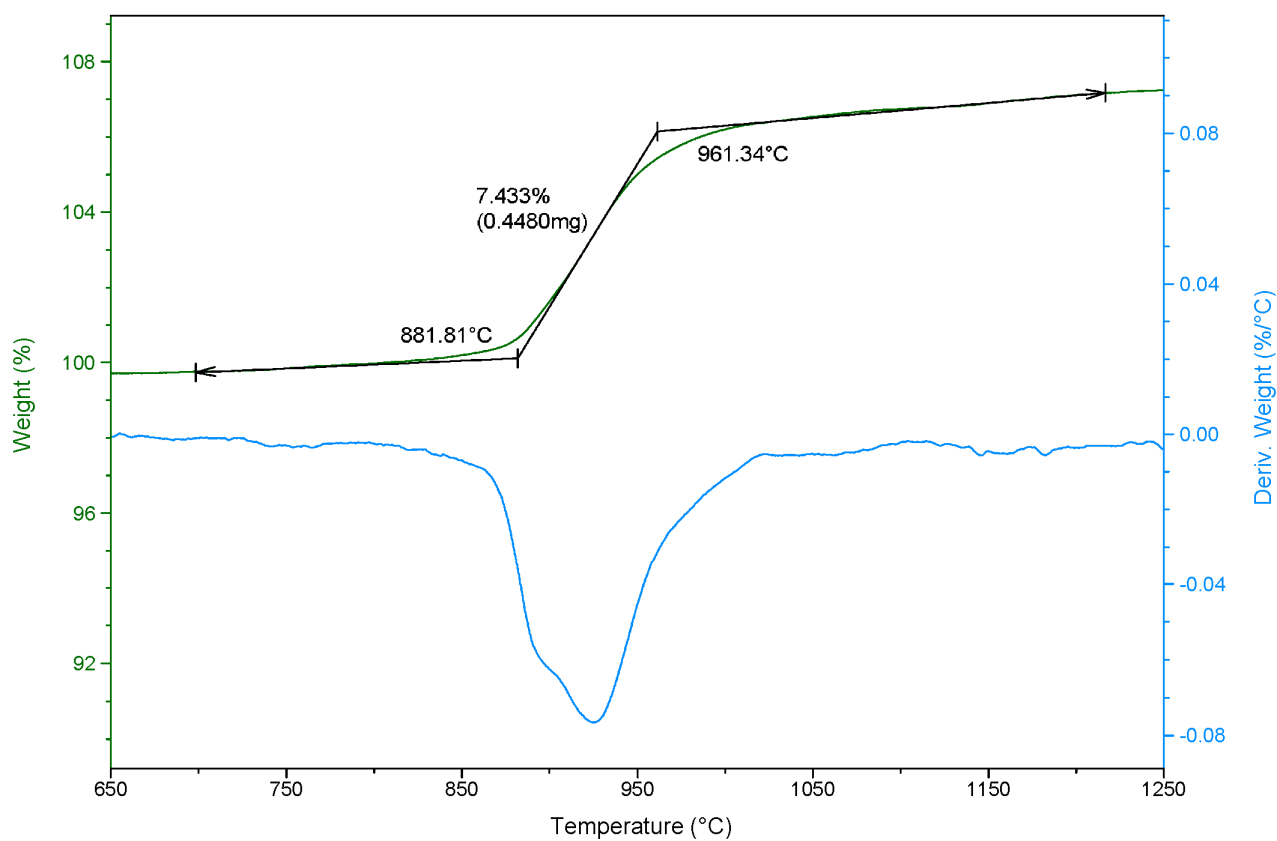

Supplement: c2jm13852b.pdf [file c2jm13852b.pdf]
